# Supplementary material for: High-Resolution Analysis and Functional Mapping of Cleavage Sites and Substrate Proteins of Furin in the Human Proteome
Source: PLoS One. 2013 Jan 15;8(1):e54290. doi: 10.1371/journal.pone.0054290 (PMC3545927; doi:10.1371/journal.pone.0054290)
Supplement: Table S3 — All predicted furin substrates. (XLS) [file pone.0054290.s003.xls]

## Sheet: Table.S3_new
Predicted furin substrates - soluble proteins (453 cleavages, 358 unique proteins)
Position	Peptide sequence	Cleavage position	Protein length	gi number	NP number	Protein name
P4-P4'	RAKRFVSI	212	950	>gi|21265058|	ref|NP_620686.1|	a disintegrin-like and metalloprotease (reprolysin type) with thrombospondin type 1 motif, 15 preproprotein [Homo sapiens]
P4-P4'	RKKRLISY	253	1910	>gi|124430557|	ref|NP_079279.3|	a disintegrin-like and metalloprotease with thrombospondin type 1 motifs 20 [Homo sapiens]
P4-P4'	RKYREVFC	1440	1910	>gi|124430557|	ref|NP_079279.3|	a disintegrin-like and metalloprotease with thrombospondin type 1 motifs 20 [Homo sapiens]
P4-P4'	RQKRSSEA	66	1910	>gi|124430557|	ref|NP_079279.3|	a disintegrin-like and metalloprotease with thrombospondin type 1 motifs 20 [Homo sapiens]
P4-P4'	RRKRHDIA	289	540	>gi|54292117|	ref|NP_068547.2|	ADAM metallopeptidase domain 28 isoform 3 preproprotein [Homo sapiens]
P4-P4'	RRRRAVLP	205	655	>gi|54292121|	ref|NP_001005845.1|	ADAM metallopeptidase domain 9 isoform 2 precursor [Homo sapiens]
P4-P4'	RKKRFVSS	252	967	>gi|50845384|	ref|NP_008919.3|	ADAM metallopeptidase with thrombospondin type 1 motif, 1 preproprotein [Homo sapiens]
P4-P4'	RQRRGTGA	66	1103	>gi|56121815|	ref|NP_112219.2|	ADAM metallopeptidase with thrombospondin type 1 motif, 10 preproprotein [Homo sapiens]
P4-P4'	LSRRSISK	240	1594	>gi|51558724|	ref|NP_112217.2|	ADAM metallopeptidase with thrombospondin type 1 motif, 12 preproprotein [Homo sapiens]
P4-P4'	RRKRDLDG	82	1594	>gi|51558724|	ref|NP_112217.2|	ADAM metallopeptidase with thrombospondin type 1 motif, 12 preproprotein [Homo sapiens]
P4-P4'	RKRRHAKP	252	1226	>gi|110611167|	ref|NP_631894.2|	ADAM metallopeptidase with thrombospondin type 1 motif, 14 isoform 1 preproprotein [Homo sapiens]
P4-P4'	RRRRDHHM	881	1226	>gi|110611167|	ref|NP_631894.2|	ADAM metallopeptidase with thrombospondin type 1 motif, 14 isoform 1 preproprotein [Homo sapiens]
P4-P4'	RHKRSLLR	279	1224	>gi|110735441|	ref|NP_620687.2|	ADAM metallopeptidase with thrombospondin type 1 motif, 16 preproprotein [Homo sapiens]
P4-P4'	RRRRAVPV	87	1224	>gi|110735441|	ref|NP_620687.2|	ADAM metallopeptidase with thrombospondin type 1 motif, 16 preproprotein [Homo sapiens]
P4-P4'	RERRNAIR	223	1095	>gi|110611170|	ref|NP_620688.2|	ADAM metallopeptidase with thrombospondin type 1 motif, 17 preproprotein [Homo sapiens]
P4-P4'	RKKRSAQN	88	1221	>gi|40806187|	ref|NP_955387.1|	ADAM metallopeptidase with thrombospondin type 1 motif, 18 preproprotein [Homo sapiens]
P4-P4'	RPRRSAGK	284	1221	>gi|40806187|	ref|NP_955387.1|	ADAM metallopeptidase with thrombospondin type 1 motif, 18 preproprotein [Homo sapiens]
P4-P4'	RQKRSMEE	277	1207	>gi|112789555|	ref|NP_598377.3|	ADAM metallopeptidase with thrombospondin type 1 motif, 19 preproprotein [Homo sapiens]
P4-P4'	RARRHAAD	259	1211	>gi|110825974|	ref|NP_055059.2|	ADAM metallopeptidase with thrombospondin type 1 motif, 2 isoform 1 preproprotein [Homo sapiens]
P4-P4'	RRRRHAGE	249	1205	>gi|21265037|	ref|NP_055058.1|	ADAM metallopeptidase with thrombospondin type 1 motif, 3 proprotein [Homo sapiens]
P4-P4'	RSARDVSS	71	1205	>gi|21265037|	ref|NP_055058.1|	ADAM metallopeptidase with thrombospondin type 1 motif, 3 proprotein [Homo sapiens]
P4-P4'	RRRRSISR	261	930	>gi|195539372|	ref|NP_008969.2|	ADAM metallopeptidase with thrombospondin type 1 motif, 5 preproprotein [Homo sapiens]
P4-P4'	RQKRSVSI	244	1117	>gi|64276808|	ref|NP_922932.2|	ADAM metallopeptidase with thrombospondin type 1 motif, 6 preproprotein [Homo sapiens]
P4-P4'	RRRRSMDP	71	1117	>gi|64276808|	ref|NP_922932.2|	ADAM metallopeptidase with thrombospondin type 1 motif, 6 preproprotein [Homo sapiens]
P4-P4'	LRKRDVSV	70	1686	>gi|38683827|	ref|NP_055087.2|	ADAM metallopeptidase with thrombospondin type 1 motif, 7 preproprotein [Homo sapiens]
P4-P4'	RTKRFVSE	213	889	>gi|153792351|	ref|NP_008968.4|	ADAM metallopeptidase with thrombospondin type 1 motif, 8 preproprotein [Homo sapiens]
P4-P4'	RTKRFLSY	287	1935	>gi|33624896|	ref|NP_891550.1|	ADAM metallopeptidase with thrombospondin type 1 motif, 9 preproprotein [Homo sapiens]
P4-P4'	RTRRSINS	74	1935	>gi|33624896|	ref|NP_891550.1|	ADAM metallopeptidase with thrombospondin type 1 motif, 9 preproprotein [Homo sapiens]
P4-P4'	RTARSEED	27	525	>gi|154275765|	ref|NP_443098.3|	ADAMTS-like 1 isoform 2 precursor [Homo sapiens]
P4-P4'	RNTRSDED	69	1691	>gi|145275198|	ref|NP_997400.2|	ADAMTS-like 3 precursor [Homo sapiens]
P4-P4'	RLRRASWV	114	501	>gi|23503291|	ref|NP_699191.1|	adenomatosis polyposis coli down-regulated 1-like [Homo sapiens]
P4-P4'	RTKRYVVF	2300	2828	>gi|139948432|	ref|NP_056234.2|	adlican [Homo sapiens]
P4-P4'	RWRRVAVG	74	496	>gi|31542509|	ref|NP_112574.3|	ADP-dependent glucokinase [Homo sapiens]
P4-P4'	RGKRELRM	44	185	>gi|4501945|	ref|NP_001115.1|	adrenomedullin [Homo sapiens]
P4-P4'	RRRRSLPE	152	185	>gi|4501945|	ref|NP_001115.1|	adrenomedullin [Homo sapiens]
P4-P4'	RVKRYRQS	94	185	>gi|4501945|	ref|NP_001115.1|	adrenomedullin [Homo sapiens]
P4-P4'	LQKRSSRH	2303	2317	>gi|126090883|	ref|NP_001126.2|	aggrecan isoform 1 precursor [Homo sapiens]
P4-P4'	RHPRRSRP	2309	2317	>gi|126090883|	ref|NP_001126.2|	aggrecan isoform 1 precursor [Homo sapiens]
P4-P4'	RPRRETCH	249	921	>gi|73486666|	ref|NP_001842.3|	alpha 1 type IX collagen isoform 1 precursor [Homo sapiens]
P4-P4'	RRGRAGSD	611	1838	>gi|89276751|	ref|NP_000084.3|	alpha 1 type V collagen preproprotein [Homo sapiens]
P4-P4'	RTRRNIDA	1585	1838	>gi|89276751|	ref|NP_000084.3|	alpha 1 type V collagen preproprotein [Homo sapiens]
P4-P4'	RVRRNAKK	110	1142	>gi|47778921|	ref|NP_001849.2|	alpha 1 type XIX collagen precursor [Homo sapiens]
P4-P4'	RDRRAAGS	2610	3177	>gi|55743098|	ref|NP_004360.2|	alpha 3 type VI collagen isoform 1 precursor [Homo sapiens]
P4-P4'	RVRRAVLP	205	352	>gi|4502067|	ref|NP_001624.1|	alpha-1-microglobulin/bikunin preproprotein [Homo sapiens]
P4-P4'	RTGRSIVY	196	429	>gi|4504009|	ref|NP_000160.1|	alpha-galactosidase A precursor [Homo sapiens]
P4-P4'	REARAVIF	98	751	>gi|73486661|	ref|NP_001082.2|	amiloride binding protein 1 precursor [Homo sapiens]
P4-P4'	RFKRKLPK	571	751	>gi|73486661|	ref|NP_001082.2|	amiloride binding protein 1 precursor [Homo sapiens]
P4-P4'	RQKREIDV	97	491	>gi|4757752|	ref|NP_004664.1|	angiopoietin-like 1 precursor [Homo sapiens]
P4-P4'	RYKRAGES	46	493	>gi|6912236|	ref|NP_036230.1|	angiopoietin-like 2 precursor [Homo sapiens]
P4-P4'	RRKRLPEM	164	406	>gi|21536398|	ref|NP_647475.1|	angiopoietin-like 4 protein isoform a precursor [Homo sapiens]
P4-P4'	RHARNVDR	250	333	>gi|16933553|	ref|NP_060623.2|	anthrax toxin receptor 1 isoform 3 precursor [Homo sapiens]
P4-P4'	RLLRDADD	168	317	>gi|4557325|	ref|NP_000032.1|	apolipoprotein E precursor [Homo sapiens]
P4-P4'	RVGRSLPT	164	326	>gi|4502165|	ref|NP_001629.1|	apolipoprotein F precursor [Homo sapiens]
P4-P4'	RRARASDR	125	164	>gi|13259533|	ref|NP_000481.2|	arginine vasopressin-neurophysin II preproprotein [Homo sapiens]
P4-P4'	HPKRAVRE	295	935	>gi|157426856|	ref|NP_001098717.1|	armadillo repeat containing 5 isoform a [Homo sapiens]
P4-P4'	RFPRFVNV	168	251	>gi|11342670|	ref|NP_001691.1|	azurocidin 1 preproprotein [Homo sapiens]
P4-P4'	RHKRTIPM	117	204	>gi|7661536|	ref|NP_056496.1|	B9 protein [Homo sapiens]
P4-P4'	RRTRSFSW	413	685	>gi|37693519|	ref|NP_597725.1|	BMP-binding endothelial regulator precursor protein [Homo sapiens]
P4-P4'	RNQRDAWI	64	101	>gi|78486578|	ref|NP_001030582.1|	bolA-like 3 isoform 2 [Homo sapiens]
P4-P4'	RSRRAATS	120	730	>gi|4502421|	ref|NP_001190.1|	bone morphogenetic protein 1 isoform 1 precursor [Homo sapiens]
P4-P4'	RRRKSLKT	805	823	>gi|5902808|	ref|NP_006119.1|	bone morphogenetic protein 1 isoform 2 precursor [Homo sapiens]
P4-P4'	RKKRSTGV	289	472	>gi|126507087|	ref|NP_001192.2|	bone morphogenetic protein 3 preproprotein [Homo sapiens]
P4-P4'	RAKRSPKH	292	408	>gi|157276593|	ref|NP_001193.2|	bone morphogenetic protein 4 preproprotein [Homo sapiens]
P4-P4'	RSIRSTGS	292	431	>gi|4502427|	ref|NP_001710.1|	bone morphogenetic protein 7 precursor [Homo sapiens]
P4-P4'	RERRDVQR	42	402	>gi|145611428|	ref|NP_861525.2|	bone morphogenetic protein 8A [Homo sapiens]
P4-P4'	RTPRAVRP	263	402	>gi|145611428|	ref|NP_861525.2|	bone morphogenetic protein 8A [Homo sapiens]
P4-P4'	RTPRAVRP	263	402	>gi|29571106|	ref|NP_001711.2|	bone morphogenetic protein 8B preproprotein [Homo sapiens]
P4-P4'	RVRRHSDP	128	247	>gi|25306253|	ref|NP_733928.1|	brain-derived neurotrophic factor isoform a preproprotein [Homo sapiens]
P4-P4'	RPARALHP	878	911	>gi|38372935|	ref|NP_068767.3|	brevican isoform 1 [Homo sapiens]
P4-P4'	RQKRSIVV	138	713	>gi|4502719|	ref|NP_001248.1|	cadherin 13 preproprotein [Homo sapiens]
P4-P4'	RRRRDLQA	124	128	>gi|76880478|	ref|NP_001029125.1|	calcitonin isoform CGRP preproprotein [Homo sapiens]
P4-P4'	RRRRDLQA	123	127	>gi|9945304|	ref|NP_000719.1|	calcitonin-related polypeptide, beta [Homo sapiens]
P4-P4'	RTGRSREV	57	248	>gi|22749479|	ref|NP_689968.1|	canopy 4 homolog [Homo sapiens]
P4-P4'	RNHRDAGA	439	568	>gi|68508967|	ref|NP_001020366.1|	carboxylesterase 1 isoform a precursor [Homo sapiens]
P4-P4'	RKTRSHTA	240	419	>gi|4502997|	ref|NP_001859.1|	carboxypeptidase A1 precursor [Homo sapiens]
P4-P4'	RKNRSKNQ	237	417	>gi|221316749|	ref|NP_001861.2|	carboxypeptidase A3 precursor [Homo sapiens]
P4-P4'	RLKRAVWI	187	437	>gi|188536067|	ref|NP_065094.3|	carboxypeptidase A6 isoform 1 precursor [Homo sapiens]
P4-P4'	RNRRSLSG	129	437	>gi|188536067|	ref|NP_065094.3|	carboxypeptidase A6 isoform 1 precursor [Homo sapiens]
P4-P4'	RKSRSPHN	169	374	>gi|27436871|	ref|NP_775100.1|	carboxypeptidase O [Homo sapiens]
P4-P4'	RMKRAGRV	573	652	>gi|62388877|	ref|NP_001014447.1|	carboxypeptidase Z isoform 1 [Homo sapiens]
P4-P4'	RNKREDRT	724	1184	>gi|192449445|	ref|NP_003604.3|	cartilage intermediate layer protein [Homo sapiens]
P4-P4'	RQQRASRG	1157	1184	>gi|192449445|	ref|NP_003604.3|	cartilage intermediate layer protein [Homo sapiens]
P4-P4'	RIRRGTDE	443	463	>gi|189083844|	ref|NP_001805.3|	cathepsin C isoform a preproprotein [Homo sapiens]
P4-P4'	RVRRAGQG	71	484	>gi|6042196|	ref|NP_003784.2|	cathepsin F [Homo sapiens]
P4-P4'	REIRSEEP	120	376	>gi|23110964|	ref|NP_001326.2|	cathepsin W preproprotein [Homo sapiens]
P4-P4'	RRRRSIQN	1273	1445	>gi|115529484|	ref|NP_598000.2|	CD109 antigen isoform 1 precursor [Homo sapiens]
P4-P4'	RLKRDPGI	81	181	>gi|5901910|	ref|NP_008984.1|	CD160 antigen [Homo sapiens]
P4-P4'	REKRDVQP	396	437	>gi|110735433|	ref|NP_065139.2|	CD177 molecule [Homo sapiens]
P4-P4'	RQRRGCFR	205	595	>gi|193788560|	ref|NP_057258.3|	cerebral endothelial cell adhesion molecule 1 [Homo sapiens]
P4-P4'	RMRRHHHH	1282	1321	>gi|118600983|	ref|NP_004377.2|	chondroitin sulfate proteoglycan 3 [Homo sapiens]
P4-P4'	RPDRSSQG	292	677	>gi|221316599|	ref|NP_001810.2|	chromogranin B precursor [Homo sapiens]
P4-P4'	RIVRSLMP	227	449	>gi|42740907|	ref|NP_976084.1|	clusterin isoform 2 [Homo sapiens]
P4-P4'	RVRRANTF	43	622	>gi|4503635|	ref|NP_000497.1|	coagulation factor II preproprotein [Homo sapiens]
P4-P4'	RPKRYNSG	46	461	>gi|4503649|	ref|NP_000124.1|	coagulation factor IX preproprotein [Homo sapiens]
P4-P4'	RLKKSQFL	1022	2224	>gi|105990535|	ref|NP_000121.2|	coagulation factor V precursor [Homo sapiens]
P4-P4'	RSKRALKQ	1332	2351	>gi|4503647|	ref|NP_000123.1|	coagulation factor VIII isoform a precursor [Homo sapiens]
P4-P4'	RSKRLMKR	2042	2263	>gi|156616290|	ref|NP_001096078.1|	collagen type VI alpha 6 [Homo sapiens]
P4-P4'	RVARSGRD	2231	2263	>gi|156616290|	ref|NP_001096078.1|	collagen type VI alpha 6 [Homo sapiens]
P4-P4'	RRRRFVPV	1500	1745	>gi|110735435|	ref|NP_056534.2|	collagen, type V, alpha 3 preproprotein [Homo sapiens]
P4-P4'	RGPRSSSA	1020	1284	>gi|112734845|	ref|NP_065933.2|	collagen, type XX, alpha 1 [Homo sapiens]
P4-P4'	RKRRDTGG	885	2526	>gi|183583553|	ref|NP_694996.5|	collagen, type XXIX, alpha 1 [Homo sapiens]
P4-P4'	RVCRDLMD	1691	1860	>gi|32140760|	ref|NP_116277.2|	collagen, type XXVII, alpha 1 [Homo sapiens]
P4-P4'	RMKRSRCP	673	769	>gi|27437042|	ref|NP_724780.2|	colony stimulating factor 3 receptor isoform b precursor [Homo sapiens]
P4-P4'	RAPRSKVP	719	752	>gi|14550407|	ref|NP_000054.2|	complement component 2 isoform 1 preproprotein [Homo sapiens]
P4-P4'	RRRRSVQL	671	1663	>gi|115298678|	ref|NP_000055.2|	complement component 3 precursor [Homo sapiens]
P4-P4'	RKKRNVNF	679	1744	>gi|67190748|	ref|NP_009224.2|	complement component 4A preproprotein [Homo sapiens]
P4-P4'	RQIRGLEE	1352	1744	>gi|67190748|	ref|NP_009224.2|	complement component 4A preproprotein [Homo sapiens]
P4-P4'	RQRRALER	1600	1744	>gi|67190748|	ref|NP_009224.2|	complement component 4A preproprotein [Homo sapiens]
P4-P4'	RRRREAPK	1453	1744	>gi|67190748|	ref|NP_009224.2|	complement component 4A preproprotein [Homo sapiens]
P4-P4'	RKKRNVNF	679	1744	>gi|178557739|	ref|NP_001002029.3|	complement component 4B preproprotein [Homo sapiens]
P4-P4'	RQIRGLEE	1352	1744	>gi|178557739|	ref|NP_001002029.3|	complement component 4B preproprotein [Homo sapiens]
P4-P4'	RQRRALER	1600	1744	>gi|178557739|	ref|NP_001002029.3|	complement component 4B preproprotein [Homo sapiens]
P4-P4'	RRRREAPK	1453	1744	>gi|178557739|	ref|NP_001002029.3|	complement component 4B preproprotein [Homo sapiens]
P4-P4'	RVRRAATP	30	584	>gi|4557389|	ref|NP_000553.1|	complement component 8, alpha polypeptide precursor [Homo sapiens]
P4-P4'	RRKRIVGG	339	583	>gi|119392081|	ref|NP_000195.2|	complement factor I preproprotein [Homo sapiens]
P4-P4'	RYRRCVGW	103	469	>gi|223671861|	ref|NP_001138724.1|	complement factor properdin precursor [Homo sapiens]
P4-P4'	RKIRTVGN	854	1026	>gi|28373122|	ref|NP_783200.1|	contactin 4 isoform a precursor [Homo sapiens]
P4-P4'	RMIRTNEA	767	1100	>gi|7657359|	ref|NP_055176.1|	contactin 5 isoform long [Homo sapiens]
P4-P4'	RSIRSSQN	151	322	>gi|47080099|	ref|NP_001873.2|	corticotropin releasing hormone binding protein [Homo sapiens]
P4-P4'	RERRSEEP	153	196	>gi|4503041|	ref|NP_000747.1|	corticotropin releasing hormone precursor [Homo sapiens]
P4-P4'	RVRKSLKK	137	224	>gi|55770842|	ref|NP_000558.2|	C-reactive protein, pentraxin-related [Homo sapiens]
P4-P4'	RRVRDKDG	38	197	>gi|148728186|	ref|NP_005743.3|	C-type lectin domain family 3 member A [Homo sapiens]
P4-P4'	RQKRSINL	35	3623	>gi|126091152|	ref|NP_001072.2|	cubilin [Homo sapiens]
P4-P4'	RARRDHFS	104	540	>gi|8922976|	ref|NP_060850.1|	DEAD (Asp-Glu-Ala-Asp) box polypeptide 28 [Homo sapiens]
P4-P4'	RRRRSLPG	523	540	>gi|8922976|	ref|NP_060850.1|	DEAD (Asp-Glu-Ala-Asp) box polypeptide 28 [Homo sapiens]
P4-P4'	RMRRDGWP	440	729	>gi|38201710|	ref|NP_006377.2|	DEAD box polypeptide 17 isoform 1 [Homo sapiens]
P4-P4'	RTARSTNK	511	729	>gi|38201710|	ref|NP_006377.2|	DEAD box polypeptide 17 isoform 1 [Homo sapiens]
P4-P4'	RSKRDVGS	1756	1785	>gi|148539840|	ref|NP_004397.2|	deleted in malignant brain tumors 1 isoform a precursor [Homo sapiens]
P4-P4'	RLRRSLKP	259	299	>gi|4503347|	ref|NP_001365.1|	deoxyribonuclease I-like 2 [Homo sapiens]
P4-P4'	RVARVARE	315	396	>gi|19482158|	ref|NP_066382.1|	desert hedgehog preproprotein [Homo sapiens]
P4-P4'	RQKREWIK	49	1049	>gi|119703744|	ref|NP_001933.2|	desmoglein 1 preproprotein [Homo sapiens]
P4-P4'	RQKREWVK	49	999	>gi|119964718|	ref|NP_001935.2|	desmoglein 3 preproprotein [Homo sapiens]
P4-P4'	RRKRCMRH	120	266	>gi|7110719|	ref|NP_036374.1|	dickkopf homolog 1 precursor [Homo sapiens]
P4-P4'	RCQRDAMC	75	224	>gi|7657025|	ref|NP_055235.1|	dickkopf homolog 4 precursor [Homo sapiens]
P4-P4'	RRARHPGQ	209	485	>gi|194272192|	ref|NP_001120860.2|	double homeobox, 4-like [Homo sapiens]
P4-P4'	RRKRTAVT	159	485	>gi|194272192|	ref|NP_001120860.2|	double homeobox, 4-like [Homo sapiens]
P4-P4'	RGKRFSQS	77	366	>gi|27436881|	ref|NP_003231.2|	endometrial bleeding associated factor preproprotein [Homo sapiens]
P4-P4'	RCKRTVLD	45	184	>gi|5901946|	ref|NP_008967.1|	endothelial cell-specific molecule 1 isoform a precursor [Homo sapiens]
P4-P4'	RNKRNSKM	330	500	>gi|5174497|	ref|NP_006024.1|	endothelial lipase precursor [Homo sapiens]
P4-P4'	RLRRSKRC	49	212	>gi|154800437|	ref|NP_001946.3|	endothelin 1 [Homo sapiens]
P4-P4'	RSKRALEN	92	212	>gi|154800437|	ref|NP_001946.3|	endothelin 1 [Homo sapiens]
P4-P4'	RRRRSLPR	90	178	>gi|4503463|	ref|NP_001947.1|	endothelin 2 preproprotein [Homo sapiens]
P4-P4'	RGKRSAGP	140	238	>gi|4557545|	ref|NP_000105.1|	endothelin 3 isoform 1 preproprotein [Homo sapiens]
P4-P4'	RARRTLGH	446	715	>gi|4503595|	ref|NP_000493.1|	eosinophil peroxidase [Homo sapiens]
P4-P4'	REKRAAEQ	184	213	>gi|4758230|	ref|NP_004206.1|	estrogen receptor binding site associated antigen 9 [Homo sapiens]
P4-P4'	VRKRSPWL	279	426	>gi|50878302|	ref|NP_001002901.1|	Fc receptor-like B [Homo sapiens]
P4-P4'	RAKRRGGG	44	2871	>gi|24430141|	ref|NP_000129.2|	fibrillin 1 precursor [Homo sapiens]
P4-P4'	RKRRSTNE	2731	2871	>gi|24430141|	ref|NP_000129.2|	fibrillin 1 precursor [Homo sapiens]
P4-P4'	RPRRSAHR	2689	2809	>gi|56237021|	ref|NP_115823.3|	fibrillin 3 precursor [Homo sapiens]
P4-P4'	RVRRRGSP	47	2809	>gi|56237021|	ref|NP_115823.3|	fibrillin 3 precursor [Homo sapiens]
P4-P4'	RPVRGIHT	630	644	>gi|11761629|	ref|NP_068657.1|	fibrinogen, alpha polypeptide isoform alpha preproprotein [Homo sapiens]
P4-P4'	RPVRDCDD	630	866	>gi|4503689|	ref|NP_000499.1|	fibrinogen, alpha polypeptide isoform alpha-E preproprotein [Homo sapiens]
P4-P4'	RTKRTRRP	208	216	>gi|4503693|	ref|NP_003858.1|	fibroblast growth factor 17 precursor [Homo sapiens]
P4-P4'	RGPRSYPH	31	170	>gi|10190672|	ref|NP_065688.1|	fibroblast growth factor 22 precursor [Homo sapiens]
P4-P4'	RAKRAFLP	143	251	>gi|10190674|	ref|NP_065689.1|	fibroblast growth factor 23 precursor [Homo sapiens]
P4-P4'	RHTRSAED	179	251	>gi|10190674|	ref|NP_065689.1|	fibroblast growth factor 23 precursor [Homo sapiens]
P4-P4'	RHTRSYDY	54	194	>gi|4503705|	ref|NP_002000.1|	fibroblast growth factor 7 precursor [Homo sapiens]
P4-P4'	RVRRLFCR	68	194	>gi|4503705|	ref|NP_002000.1|	fibroblast growth factor 7 precursor [Homo sapiens]
P4-P4'	RLRRDTQQ	155	438	>gi|51972210|	ref|NP_001004318.1|	FLJ16165 protein [Homo sapiens]
P4-P4'	RNRRALRD	110	492	>gi|145580617|	ref|NP_775811.2|	fucosyltransferase 11 (alpha (1,3) fucosyltransferase) [Homo sapiens]
P4-P4'	RCRRALRR	66	269	>gi|11545875|	ref|NP_071422.1|	GDNF family receptor alpha 4 isoform a precursor [Homo sapiens]
P4-P4'	RVCRCARA	131	299	>gi|22091448|	ref|NP_665705.1|	GDNF family receptor alpha 4 isoform b precursor [Homo sapiens]
P4-P4'	RLKRSPDK	77	211	>gi|4503975|	ref|NP_000505.1|	glial cell derived neurotrophic factor isoform 1 preproprotein [Homo sapiens]
P4-P4'	RGRRDFPE	130	180	>gi|4503945|	ref|NP_002045.1|	glucagon preproprotein [Homo sapiens]
P4-P4'	RDRRGCFA	226	622	>gi|31377697|	ref|NP_078932.2|	glycosyltransferase 25 domain containing 1 [Homo sapiens]
P4-P4'	RISRSISE	354	556	>gi|21614525|	ref|NP_001439.2|	glypican 4 [Homo sapiens]
P4-P4'	RSARSAPE	354	555	>gi|5031719|	ref|NP_005699.1|	glypican 6 precursor [Homo sapiens]
P4-P4'	RQRRAFQV	48	678	>gi|4557617|	ref|NP_000811.1|	growth arrest-specific 6 isoform 1 precursor [Homo sapiens]
P4-P4'	RPRRDAEP	253	372	>gi|110349792|	ref|NP_001483.3|	growth differentiation factor 1 [Homo sapiens]
P4-P4'	RVRRAAQA	290	478	>gi|4826740|	ref|NP_004953.1|	growth differentiation factor 10 precursor [Homo sapiens]
P4-P4'	RRKRSAGA	319	429	>gi|7705308|	ref|NP_057288.1|	growth differentiation factor 2 [Homo sapiens]
P4-P4'	RKRRAAIP	250	364	>gi|10190670|	ref|NP_065685.1|	growth differentiation factor 3 precursor [Homo sapiens]
P4-P4'	RKRRAPLA	381	501	>gi|4503969|	ref|NP_000548.1|	growth differentiation factor 5 preproprotein [Homo sapiens]
P4-P4'	RRRRTAFA	335	455	>gi|48475062|	ref|NP_001001557.1|	growth differentiation factor 6 precursor [Homo sapiens]
P4-P4'	RAARRAAG	74	450	>gi|61835232|	ref|NP_878248.2|	growth differentiation factor 7 preproprotein [Homo sapiens]
P4-P4'	RRRRTALA	321	450	>gi|61835232|	ref|NP_878248.2|	growth differentiation factor 7 preproprotein [Homo sapiens]
P4-P4'	RLGRQVDS	77	108	>gi|11034841|	ref|NP_066567.1|	growth hormone releasing hormone preproprotein [Homo sapiens]
P4-P4'	RMRRYADA	31	108	>gi|11034841|	ref|NP_066567.1|	growth hormone releasing hormone preproprotein [Homo sapiens]
P4-P4'	RDRRMMSQ	54	700	>gi|20143973|	ref|NP_071920.1|	hedgehog-interacting protein [Homo sapiens]
P4-P4'	RRRRCLNG	38	700	>gi|20143973|	ref|NP_071920.1|	hedgehog-interacting protein [Homo sapiens]
P4-P4'	RYPRDVRD	222	462	>gi|11321561|	ref|NP_000604.1|	hemopexin precursor [Homo sapiens]
P4-P4'	RMKREITT	752	791	>gi|52145310|	ref|NP_004276.2|	hexose-6-phosphate dehydrogenase precursor [Homo sapiens]
P4-P4'	RAGRSAPL	29	480	>gi|4506141|	ref|NP_002766.1|	HtrA serine peptidase 1 precursor [Homo sapiens]
P4-P4'	RPRRRCSP	323	354	>gi|4503053|	ref|NP_001875.1|	hyaluronan and proteoglycan link protein 1 [Homo sapiens]
P4-P4'	RHKRRSKF	170	560	>gi|4758502|	ref|NP_004123.1|	hyaluronan binding protein 2 preproprotein [Homo sapiens]
P4-P4'	RQKRIHSA	192	206	>gi|4557657|	ref|NP_001536.1|	immature colon carcinoma transcript 1 [Homo sapiens]
P4-P4'	RIIRSSED	46	159	>gi|21489959|	ref|NP_653247.1|	immunoglobulin J chain [Homo sapiens]
P4-P4'	RRRRGLEC	310	426	>gi|4504699|	ref|NP_002183.1|	inhibin beta A precursor [Homo sapiens]
P4-P4'	RKKRSGRH	114	139	>gi|4504711|	ref|NP_002186.1|	insulin-like 4 precursor [Homo sapiens]
P4-P4'	RWRRHQEG	48	135	>gi|38569233|	ref|NP_005469.2|	insulin-like 5 precursor [Homo sapiens]
P4-P4'	RKRRGYSE	172	213	>gi|38569396|	ref|NP_009110.2|	insulin-like 6 precursor [Homo sapiens]
P4-P4'	KSARSVRA	119	158	>gi|163659899|	ref|NP_001104753.1|	insulin-like growth factor 1 isoform 1 preproprotein [Homo sapiens]
P4-P4'	VSRRSRGI	62	180	>gi|108796063|	ref|NP_001007140.2|	insulin-like growth factor 2 isoform 1 precursor [Homo sapiens]
P4-P4'	RQCRSSQG	202	240	>gi|11321593|	ref|NP_002169.1|	insulin-like growth factor binding protein 6 [Homo sapiens]
P4-P4'	RKRRKGKA	94	282	>gi|4504619|	ref|NP_001544.1|	insulin-like growth factor binding protein 7 [Homo sapiens]
P4-P4'	RTKRAQSP	30	237	>gi|12545402|	ref|NP_071772.1|	intercellular adhesion molecule 4 isoform 2 precursor [Homo sapiens]
P4-P4'	RMKRIFYR	139	171	>gi|8923756|	ref|NP_060872.1|	interleukin 26 precursor [Homo sapiens]
P4-P4'	RVKKSVEV	94	144	>gi|10834980|	ref|NP_000581.1|	interleukin 9 precursor [Homo sapiens]
P4-P4'	RTKRSAFF	70	797	>gi|6631090|	ref|NP_001554.2|	interphotoreceptor matrix proteoglycan 1 [Homo sapiens]
P4-P4'	RIGRAVRP	141	267	>gi|91823048|	ref|NP_071329.2|	kallikrein 14 preproprotein [Homo sapiens]
P4-P4'	RTTRSVVH	114	276	>gi|22208982|	ref|NP_002767.2|	kallikrein-related peptidase 10 preproprotein [Homo sapiens]
P4-P4'	RHRRFRLD	445	838	>gi|21955174|	ref|NP_665697.1|	kinesin family member C2 [Homo sapiens]
P4-P4'	VVARSVNG	277	710	>gi|54607120|	ref|NP_002334.2|	lactotransferrin precursor [Homo sapiens]
P4-P4'	RKRRQTGQ	2579	3122	>gi|28559088|	ref|NP_000417.2|	laminin alpha 2 subunit isoform a precursor [Homo sapiens]
P4-P4'	RNRRIITV	2593	3075	>gi|38788416|	ref|NP_005550.2|	laminin, alpha 1 precursor [Homo sapiens]
P4-P4'	RRARSWAE	1594	1798	>gi|119703755|	ref|NP_002283.3|	laminin, beta 2 precursor [Homo sapiens]
P4-P4'	RSHRDTAT	1167	1575	>gi|110611156|	ref|NP_006050.3|	laminin, gamma 3 precursor [Homo sapiens]
P4-P4'	RTRRTSKP	86	1722	>gi|46249414|	ref|NP_996826.1|	latent transforming growth factor beta binding protein 1 isoform LTBP-1L [Homo sapiens]
P4-P4'	RYSRSSAA	64	1722	>gi|46249414|	ref|NP_996826.1|	latent transforming growth factor beta binding protein 1 isoform LTBP-1L [Homo sapiens]
P4-P4'	RCIRAFCR	68	1624	>gi|110347431|	ref|NP_001036009.1|	latent transforming growth factor beta binding protein 4 isoform a [Homo sapiens]
P4-P4'	RGKRFSQS	77	366	>gi|10337603|	ref|NP_066277.1|	left-right determination, factor B preproprotein [Homo sapiens]
P4-P4'	RCYRSCET	121	708	>gi|27764882|	ref|NP_060662.2|	leprecan-like 1 isoform a [Homo sapiens]
P4-P4'	RGRRSPHT	501	736	>gi|28466983|	ref|NP_055077.2|	leprecan-like 2 [Homo sapiens]
P4-P4'	RKRRSQDG	47	632	>gi|187607071|	ref|NP_116011.2|	ligand of numb-protein X 1 isoform b [Homo sapiens]
P4-P4'	RAKRSSKM	324	475	>gi|4557727|	ref|NP_000228.1|	lipoprotein lipase precursor [Homo sapiens]
P4-P4'	RKRRCSLS	69	77	>gi|16418465|	ref|NP_443203.1|	liver-expressed antimicrobial peptide 2 precursor [Homo sapiens]
P4-P4'	RPRRMTPF	37	77	>gi|16418465|	ref|NP_443203.1|	liver-expressed antimicrobial peptide 2 precursor [Homo sapiens]
P4-P4'	RFKRSAQF	46	727	>gi|32307144|	ref|NP_000293.2|	lysyl hydroxylase 1 precursor [Homo sapiens]
P4-P4'	RFRKAYKP	317	774	>gi|4505011|	ref|NP_002309.1|	lysyl oxidase-like 2 precursor [Homo sapiens]
P4-P4'	RNKRTCSA	178	686	>gi|21264363|	ref|NP_006601.2|	mannan-binding lectin serine protease 2 isoform 1 precursor [Homo sapiens]
P7-P1'	RYFRKRRG	100	103	>gi|49574514|	ref|NP_000891.2|	matrix Gla protein [Homo sapiens]
P4-P4'	RQKRFVLS	97	488	>gi|58331148|	ref|NP_005931.2|	matrix metalloproteinase 11 preproprotein [Homo sapiens]
P4-P4'	RSRRSPRA	144	569	>gi|22218341|	ref|NP_671724.1|	matrix metalloproteinase 21 preproprotein [Homo sapiens]
P4-P4'	RRRRYALS	107	562	>gi|11968059|	ref|NP_071913.1|	matrix metalloproteinase 25 preproprotein [Homo sapiens]
P4-P4'	RKKRFAKQ	122	520	>gi|13236530|	ref|NP_077278.1|	matrix metalloproteinase 28 isoform 1 preproprotein [Homo sapiens]
P4-P4'	RGKRSCHA	474	738	>gi|134244281|	ref|NP_005920.2|	melanoma-associated antigen p97 isoform 1 precursor [Homo sapiens]
P4-P4'	RTMRSSAG	267	302	>gi|16163666|	ref|NP_201573.1|	melanoma-associated antigen p97 isoform 2 precursor [Homo sapiens]
P4-P4'	RHGRDLYR	422	456	>gi|12232389|	ref|NP_073571.1|	methyltransferase 11 domain containing 1 isoform 2 [Homo sapiens]
P4-P4'	RQKRRAKP	64	383	>gi|167857788|	ref|NP_005922.2|	MHC class I polypeptide-related sequence B [Homo sapiens]
P4-P4'	RLRRSNYF	153	173	>gi|4505089|	ref|NP_003471.1|	microfibrillar associated protein 5 [Homo sapiens]
P4-P4'	RSPRSAST	626	894	>gi|153285408|	ref|NP_000244.2|	microsomal triglyceride transfer protein large subunit precursor [Homo sapiens]
P4-P4'	RETRSFTK	93	538	>gi|149193325|	ref|NP_689886.2|	mucin 20 isoform L [Homo sapiens]
P4-P4'	RHRRHHHQ	33	377	>gi|222418645|	ref|NP_689504.2|	mucin 7, secreted precursor [Homo sapiens]
P4-P4'	RKFRSGLI	404	487	>gi|19923761|	ref|NP_004888.2|	multiple inositol polyphosphate histidine phosphatase 1 [Homo sapiens]
P4-P4'	RSRRDFGL	266	375	>gi|4885259|	ref|NP_005250.1|	myostatin [Homo sapiens]
P4-P4'	RHLRSAGS	525	1061	>gi|167830411|	ref|NP_000897.3|	natriuretic peptide receptor 1 [Homo sapiens]
P4-P4'	RRARSAPA	52	241	>gi|70995319|	ref|NP_002497.2|	nerve growth factor, beta polypeptide precursor [Homo sapiens]
P4-P4'	RSKRSSSH	121	241	>gi|70995319|	ref|NP_002497.2|	nerve growth factor, beta polypeptide precursor [Homo sapiens]
P4-P4'	RRARDMSS	183	530	>gi|190014607|	ref|NP_115925.2|	netrin G2 [Homo sapiens]
P4-P4'	RKGRNKEI	210	291	>gi|75677385|	ref|NP_001028260.2|	neugrin, neurite outgrowth associated isoform 2 [Homo sapiens]
P4-P4'	RTKRKPSI	93	308	>gi|39930315|	ref|NP_009155.1|	neurexophilin 4 [Homo sapiens]
P4-P4'	RMKRILQR	108	153	>gi|58743316|	ref|NP_001011717.1|	neuromedin S [Homo sapiens]
P4-P4'	RAPRSPRA	116	165	>gi|153281202|	ref|NP_001092926.2|	neuropeptide W preproprotein [Homo sapiens]
P4-P4'	RLRRDVSR	141	165	>gi|153281202|	ref|NP_001092926.2|	neuropeptide W preproprotein [Homo sapiens]
P4-P4'	RRARSPHD	158	220	>gi|209954776|	ref|NP_003967.2|	neurotrophic factor artemin isoform 1 precursor [Homo sapiens]
P4-P4'	RRKRYAEH	138	257	>gi|4505469|	ref|NP_002518.1|	neurotrophin 3 isoform 2 preproprotein [Homo sapiens]
P4-P4'	RSRRGVSE	80	210	>gi|5453808|	ref|NP_006170.1|	neurotrophin 5 preproprotein [Homo sapiens]
P4-P4'	RQKRIIGG	630	875	>gi|4506143|	ref|NP_003610.1|	neurotrypsin precursor [Homo sapiens]
P4-P4'	RKRRRQHG	1761	2555	>gi|148833508|	ref|NP_060087.3|	notch1 preproprotein [Homo sapiens]
P4-P4'	RRKKSQDG	2182	2555	>gi|148833508|	ref|NP_060087.3|	notch1 preproprotein [Homo sapiens]
P4-P4'	RRRRELDP	1664	2555	>gi|148833508|	ref|NP_060087.3|	notch1 preproprotein [Homo sapiens]
P4-P4'	RAARSLLQ	1751	2003	>gi|55770876|	ref|NP_004548.3|	notch4 preproprotein [Homo sapiens]
P4-P4'	RCRRQFQE	308	496	>gi|194394139|	ref|NP_848588.3|	notum pectinacetylesterase homolog [Homo sapiens]
P4-P4'	RKKRKPEE	722	790	>gi|27262634|	ref|NP_751896.1|	nuclear autoantigenic sperm protein isoform 1 [Homo sapiens]
P4-P4'	RWKRDSSG	180	350	>gi|13129010|	ref|NP_076952.1|	nudix-type motif 9 isoform a [Homo sapiens]
P4-P4'	RMRRGAGG	519	545	>gi|22749297|	ref|NP_689848.1|	oncoprotein-induced transcript 3 [Homo sapiens]
P4-P4'	RVLRSDGK	215	545	>gi|22749297|	ref|NP_689848.1|	oncoprotein-induced transcript 3 [Homo sapiens]
P4-P4'	RSRRHSPH	221	252	>gi|10092621|	ref|NP_065391.1|	oncostatin M precursor [Homo sapiens]
P4-P4'	RPRRYLYQ	51	100	>gi|40316933|	ref|NP_954642.1|	osteocalcin preproprotein [Homo sapiens]
P4-P4'	RIKRQHSS	242	401	>gi|148743793|	ref|NP_002537.3|	osteoprotegerin precursor [Homo sapiens]
P4-P4'	RAKRFLRK	460	477	>gi|223029412|	ref|NP_001073868.2|	otoconin 90 [Homo sapiens]
P4-P4'	RKTRSTHT	237	417	>gi|54607080|	ref|NP_001862.2|	pancreatic carboxypeptidase B1 preproprotein [Homo sapiens]
P4-P4'	RQRRQVWK	199	1791	>gi|116174738|	ref|NP_064714.2|	pappalysin 2 isoform 1 [Homo sapiens]
P4-P4'	RVKKSPPE	233	1791	>gi|116174738|	ref|NP_064714.2|	pappalysin 2 isoform 1 [Homo sapiens]
P4-P4'	VKKRSVSE	31	115	>gi|4506267|	ref|NP_000306.1|	parathyroid hormone preproprotein [Homo sapiens]
P4-P4'	RLKRAVSE	36	177	>gi|39995091|	ref|NP_945316.1|	parathyroid hormone-like hormone isoform 1 preproprotein [Homo sapiens]
P4-P4'	RRRRCVGL	107	243	>gi|11641243|	ref|NP_071736.1|	peptide deformylase [Homo sapiens]
P4-P4'	RPARSVSK	555	576	>gi|156616294|	ref|NP_443122.3|	peptidoglycan recognition protein 2 precursor [Homo sapiens]
P4-P4'	RLKRSRLK	45	270	>gi|33636766|	ref|NP_071409.2|	phospholysine phosphohistidine inorganic pyrophosphate phosphatase [Homo sapiens]
P4-P4'	RGKRRREK	150	170	>gi|20149543|	ref|NP_002623.2|	placental growth factor, vascular endothelial growth factor-related protein [Homo sapiens]
P4-P4'	RKNRSFYA	205	360	>gi|126273559|	ref|NP_057497.3|	plasma carboxypeptidase B2 isoform b [Homo sapiens]
P4-P4'	RGKRATTV	493	810	>gi|4505881|	ref|NP_000292.1|	plasminogen [Homo sapiens]
P4-P4'	RFRRGARS	32	562	>gi|4505861|	ref|NP_000921.1|	plasminogen activator, tissue isoform 1 preproprotein [Homo sapiens]
P4-P4'	RRKRSIEE	86	211	>gi|77695917|	ref|NP_002598.4|	platelet-derived growth factor alpha isoform 1 preproprotein [Homo sapiens]
P4-P4'	RGRRSLGS	81	241	>gi|4505681|	ref|NP_002599.1|	platelet-derived growth factor beta isoform 1 preproprotein [Homo sapiens]
P4-P4'	RRRRVVPE	1305	2135	>gi|40254442|	ref|NP_002664.2|	plexin B1 [Homo sapiens]
P4-P4'	RYKRMVER	2047	2135	>gi|40254442|	ref|NP_002664.2|	plexin B1 [Homo sapiens]
P4-P4'	RQKRDTTH	1164	1838	>gi|149363636|	ref|NP_036533.2|	plexin B2 [Homo sapiens]
P4-P4'	RVKRDLVL	442	1838	>gi|149363636|	ref|NP_036533.2|	plexin B2 [Homo sapiens]
P4-P4'	RALRSLDL	411	512	>gi|40254971|	ref|NP_079101.2|	podocan-like 1 [Homo sapiens]
P4-P4'	MKKRDLSA	229	444	>gi|22749259|	ref|NP_689828.1|	poly (ADP-ribose) polymerase family, member 15 isoform 2 [Homo sapiens]
P4-P4'	RVTRSLDV	462	2310	>gi|205360962|	ref|NP_000287.3|	polycystin 1 isoform 2 precursor [Homo sapiens] PART - 1
P4-P4'	RIKRSAPL	905	3571	>gi|148886654|	ref|NP_699197.3|	polydom [Homo sapiens]
P7-P1'	NCSRKRRT	3568	3571	>gi|148886654|	ref|NP_699197.3|	polydom [Homo sapiens]
P4-P4'	RVKRRIEN	288	419	>gi|157805480|	ref|NP_002774.2|	pregnancy specific beta-1-glycoprotein 7 precursor [Homo sapiens]
P4-P4'	RARRDPRA	30	1627	>gi|38045915|	ref|NP_002572.2|	pregnancy-associated plasma protein A preproprotein [Homo sapiens]
P4-P4'	RQQREARG	81	1627	>gi|38045915|	ref|NP_002572.2|	pregnancy-associated plasma protein A preproprotein [Homo sapiens]
P4-P4'	KRKRSKRK	89	129	>gi|187167261|	ref|NP_001119600.1|	prokineticin 2 isoform a precursor [Homo sapiens]
P4-P4'	RSKRKKEV	92	129	>gi|187167261|	ref|NP_001119600.1|	prokineticin 2 isoform a precursor [Homo sapiens]
P4-P4'	RSPRSPPG	91	331	>gi|41349482|	ref|NP_005030.2|	proline-rich protein BstNI subfamily 1 isoform 1 preproprotein [Homo sapiens]
P4-P4'	RSARSPPG	360	416	>gi|209571537|	ref|NP_006239.3|	proline-rich protein BstNI subfamily 2 [Homo sapiens]
P4-P4'	RSPRSPPG	112	416	>gi|209571537|	ref|NP_006239.3|	proline-rich protein BstNI subfamily 2 [Homo sapiens]
P4-P4'	RSSRSPPG	174	416	>gi|209571537|	ref|NP_006239.3|	proline-rich protein BstNI subfamily 2 [Homo sapiens]
P4-P4'	RSSRSPPG	298	416	>gi|209571537|	ref|NP_006239.3|	proline-rich protein BstNI subfamily 2 [Homo sapiens]
P4-P4'	RSARSPPG	177	247	>gi|37537692|	ref|NP_002714.2|	proline-rich protein BstNI subfamily 4 precursor [Homo sapiens]
P4-P4'	RQKRLFCR	308	535	>gi|4758868|	ref|NP_004190.1|	prolyl 4-hydroxylase, alpha II subunit isoform 1 precursor [Homo sapiens]
P4-P4'	RMARNVLK	265	544	>gi|33589818|	ref|NP_878907.1|	prolyl 4-hydroxylase, alpha III subunit precursor [Homo sapiens]
P4-P4'	RSKRSALR	110	753	>gi|20336242|	ref|NP_000430.3|	proprotein convertase subtilisin/kexin type 1 preproprotein [Homo sapiens]
P4-P4'	RSRRSAFH	81	753	>gi|20336242|	ref|NP_000430.3|	proprotein convertase subtilisin/kexin type 1 preproprotein [Homo sapiens]
P4-P4'	KRRRSLHH	81	638	>gi|20336244|	ref|NP_002585.2|	proprotein convertase subtilisin/kexin type 2 [Homo sapiens]
P4-P4'	RKKRGYRD	109	638	>gi|20336244|	ref|NP_002585.2|	proprotein convertase subtilisin/kexin type 2 [Homo sapiens]
P4-P4'	RRPRDDDS	541	638	>gi|20336244|	ref|NP_002585.2|	proprotein convertase subtilisin/kexin type 2 [Homo sapiens]
P4-P4'	RVKRSVVV	113	755	>gi|76443679|	ref|NP_060043.2|	proprotein convertase subtilisin/kexin type 4 [Homo sapiens]
P4-P4'	RTKRDYDF	114	913	>gi|20336246|	ref|NP_006191.2|	proprotein convertase subtilisin/kexin type 5 preproprotein [Homo sapiens]
P4-P4'	TIKRSVIS	82	913	>gi|20336246|	ref|NP_006191.2|	proprotein convertase subtilisin/kexin type 5 preproprotein [Homo sapiens]
P4-P4'	RRARAVHD	373	521	>gi|145977198|	ref|NP_001078851.1|	prosaposin-like protein 1 [Homo sapiens]
P4-P4'	RRKRYISQ	60	258	>gi|7705676|	ref|NP_056970.1|	protease inhibitor 15 preproprotein [Homo sapiens]
P4-P4'	RRKRQIYG	128	383	>gi|6005882|	ref|NP_009104.1|	protease, serine, 23 precursor [Homo sapiens]
P4-P4'	RVKRTHVP	226	383	>gi|6005882|	ref|NP_009104.1|	protease, serine, 23 precursor [Homo sapiens]
P4-P4'	RRKRQVYG	122	413	>gi|23503297|	ref|NP_699193.1|	protease, serine, 35 [Homo sapiens]
P4-P4'	RSRREASG	208	413	>gi|23503297|	ref|NP_699193.1|	protease, serine, 35 [Homo sapiens]
P4-P4'	HLKRDTED	199	461	>gi|4506115|	ref|NP_000303.1|	protein C [Homo sapiens]
P4-P4'	RHLREVGD	247	424	>gi|13273311|	ref|NP_056042.1|	protein O-fucosyltransferase 2 isoform A [Homo sapiens]
P4-P4'	RKRRANSL	41	676	>gi|192447438|	ref|NP_000304.2|	protein S, alpha preproprotein [Homo sapiens]
P4-P4'	RFERAIGP	1306	1404	>gi|67190163|	ref|NP_005798.2|	proteoglycan 4 isoform A [Homo sapiens]
P4-P4'	RRRRFERA	1303	1404	>gi|67190163|	ref|NP_005798.2|	proteoglycan 4 isoform A [Homo sapiens]
P4-P4'	RASRDSSE	1109	1159	>gi|94538350|	ref|NP_001035519.1|	protocadherin 17 precursor [Homo sapiens]
P4-P4'	RRKRHISV	56	253	>gi|30425410|	ref|NP_848586.1|	R3H domain containing-like [Homo sapiens]
P4-P4'	RRKRKVLH	295	730	>gi|119392077|	ref|NP_036426.3|	Rap guanine nucleotide exchange factor (GEF) 5 [Homo sapiens]
P4-P4'	RRRRSLRR	3454	3460	>gi|27436938|	ref|NP_005036.2|	reelin isoform a [Homo sapiens]
P4-P4'	RKKRQLYS	161	185	>gi|20143933|	ref|NP_604390.1|	relaxin 2 isoform 1 preproprotein [Homo sapiens]
P4-P4'	RWRRSDIL	54	142	>gi|18254464|	ref|NP_543140.1|	relaxin 3 preproprotein [Homo sapiens]
P4-P4'	RRSRSPRT	207	229	>gi|124486584|	ref|NP_001074466.1|	retbindin isoform 1 [Homo sapiens]
P4-P4'	RPKRKGKC	400	441	>gi|30425553|	ref|NP_848663.1|	reticulon 4 receptor-like 1 [Homo sapiens]
P4-P4'	RHLRSLEP	120	420	>gi|30425563|	ref|NP_848665.1|	reticulon 4 receptor-like 2 [Homo sapiens]
P4-P4'	RVKRSPGL	1239	1247	>gi|4506453|	ref|NP_002891.1|	retinol-binding protein 3 precursor [Homo sapiens]
P4-P4'	RKKRNGLT	925	1651	>gi|4506569|	ref|NP_002932.1|	roundabout 1 isoform a [Homo sapiens]
P4-P4'	VRRRSVQQ	99	264	>gi|209969800|	ref|NP_694957.3|	RPE-spondin [Homo sapiens]
P4-P4'	RSKRASYV	31	243	>gi|222446611|	ref|NP_848660.3|	R-spondin family, member 2 [Homo sapiens]
P4-P4'	RWRRSKRA	28	243	>gi|222446611|	ref|NP_848660.3|	R-spondin family, member 2 [Homo sapiens]
P4-P4'	RRKKQVGT	25	234	>gi|83722284|	ref|NP_001025042.2|	R-spondin family, member 4 isoform 1 precursor [Homo sapiens]
P4-P4'	KAKRSVPP	809	870	>gi|24586659|	ref|NP_699165.2|	scavenger receptor class F, member 2 isoform 1 [Homo sapiens]
P4-P4'	RPRRELSL	480	870	>gi|24586659|	ref|NP_699165.2|	scavenger receptor class F, member 2 isoform 1 [Homo sapiens]
P4-P4'	RARRHSDG	27	121	>gi|11345450|	ref|NP_068739.1|	secretin preproprotein [Homo sapiens]
P4-P4'	RKRRSVNP	181	212	>gi|221139785|	ref|NP_001138229.1|	secretogranin V isoform 1 [Homo sapiens]
P4-P4'	RNRRTHEF	760	771	>gi|5174673|	ref|NP_006071.1|	semaphorin 3A precursor [Homo sapiens]
P4-P4'	RTRRQDIR	555	771	>gi|5174673|	ref|NP_006071.1|	semaphorin 3A precursor [Homo sapiens]
P4-P4'	RGRRSEDQ	147	751	>gi|5454048|	ref|NP_006370.1|	semaphorin 3C [Homo sapiens]
P4-P4'	RSRRQDVR	552	751	>gi|5454048|	ref|NP_006370.1|	semaphorin 3C [Homo sapiens]
P4-P4'	RFRRQDVR	560	775	>gi|6912650|	ref|NP_036563.1|	semaphorin 3E [Homo sapiens]
P4-P4'	RSRRQDVR	586	785	>gi|188497703|	ref|NP_004177.3|	semaphorin 3F [Homo sapiens]
P4-P4'	RFRRQDIR	561	782	>gi|9910362|	ref|NP_064548.1|	semaphorin sem2 [Homo sapiens]
P4-P4'	RTPREVEA	777	782	>gi|9910362|	ref|NP_064548.1|	semaphorin sem2 [Homo sapiens]
P4-P4'	RDKRSALQ	167	418	>gi|32454741|	ref|NP_001226.2|	serine (or cysteine) proteinase inhibitor, clade H, member 1 precursor [Homo sapiens]
P4-P4'	KVKREAEK	625	1094	>gi|189163501|	ref|NP_001121170.1|	serine peptidase inhibitor, Kazal type 5 isoform a precursor [Homo sapiens]
P4-P4'	RNKRESGK	355	1094	>gi|189163501|	ref|NP_001121170.1|	serine peptidase inhibitor, Kazal type 5 isoform a precursor [Homo sapiens]
P4-P4'	RNKRQSKS	425	1094	>gi|189163501|	ref|NP_001121170.1|	serine peptidase inhibitor, Kazal type 5 isoform a precursor [Homo sapiens]
P4-P4'	RYRRVAEG	294	464	>gi|4502261|	ref|NP_000479.1|	serpin peptidase inhibitor, clade C, member 1 [Homo sapiens]
P4-P4'	RRRRAAAT	34	882	>gi|150010572|	ref|NP_001092759.1|	SH3 domain containing ring finger 3 [Homo sapiens]
P4-P4'	RKKRIVTG	683	1529	>gi|4759146|	ref|NP_004778.1|	slit homolog 2 [Homo sapiens]
P4-P4'	RSKRRKYS	1499	1529	>gi|4759146|	ref|NP_004778.1|	slit homolog 2 [Homo sapiens]
P4-P4'	RQRRTVGQ	234	1523	>gi|11321571|	ref|NP_003053.1|	slit homolog 3 [Homo sapiens]
P4-P4'	RSKRRKYV	1494	1523	>gi|11321571|	ref|NP_003053.1|	slit homolog 3 [Homo sapiens]
P4-P4'	RFLRHTGR	53	950	>gi|41152074|	ref|NP_955805.1|	steroid-sensitive protein 1 [Homo sapiens]
P4-P4'	RPARFLRH	50	950	>gi|41152074|	ref|NP_955805.1|	steroid-sensitive protein 1 [Homo sapiens]
P4-P4'	RLPRSNSL	180	325	>gi|116517332|	ref|NP_054789.2|	STG protein [Homo sapiens]
P4-P4'	RKKRRRES	231	240	>gi|118582275|	ref|NP_003093.2|	superoxide dismutase 3, extracellular precursor [Homo sapiens]
P4-P4'	RSKRDPDL	39	121	>gi|7019577|	ref|NP_037383.1|	tachykinin 3 [Homo sapiens]
P4-P4'	RRKRLDWC	2084	2155	>gi|134268640|	ref|NP_005413.2|	tectorin alpha precursor [Homo sapiens]
P4-P4'	RKKRTLRG	1290	1299	>gi|62988324|	ref|NP_071376.1|	tenascin N [Homo sapiens]
P4-P4'	RRSRNVST	1051	1299	>gi|62988324|	ref|NP_071376.1|	tenascin N [Homo sapiens]
P4-P4'	RSKRNIIG	161	406	>gi|52487191|	ref|NP_055866.1|	thioredoxin domain containing 4 (endoplasmic reticulum) [Homo sapiens]
P4-P4'	RHPRSPPR	176	1074	>gi|38016904|	ref|NP_061905.2|	thrombospondin repeat containing 1 isoform 1 [Homo sapiens]
P4-P4'	RPPREEGK	562	1074	>gi|38016904|	ref|NP_061905.2|	thrombospondin repeat containing 1 isoform 1 [Homo sapiens]
P4-P4'	RHSRSQGA	200	1018	>gi|94536854|	ref|NP_079093.2|	thrombospondin, type I, domain containing 4 [Homo sapiens]
P4-P4'	RLRRQKLS	191	1018	>gi|94536854|	ref|NP_079093.2|	thrombospondin, type I, domain containing 4 [Homo sapiens]
P4-P4'	RSGRSIIN	460	1018	>gi|94536854|	ref|NP_079093.2|	thrombospondin, type I, domain containing 4 [Homo sapiens]
P4-P4'	RPKRCPRS	159	2768	>gi|55770862|	ref|NP_003226.4|	thyroglobulin [Homo sapiens]
P4-P4'	RVARFATS	403	2768	>gi|55770862|	ref|NP_003226.4|	thyroglobulin [Homo sapiens]
P4-P4'	RHRRALDT	278	390	>gi|63025222|	ref|NP_000651.3|	transforming growth factor, beta 1 [Homo sapiens]
P4-P4'	RCRRLVRE	318	353	>gi|46094076|	ref|NP_056331.2|	tsukushin [Homo sapiens]
P4-P4'	RGKRQATA	321	467	>gi|11545918|	ref|NP_071447.1|	tubulointerstitial nephritis antigen-like 1 [Homo sapiens]
P4-P4'	RYRRHGTH	396	467	>gi|11545918|	ref|NP_071447.1|	tubulointerstitial nephritis antigen-like 1 [Homo sapiens]
P4-P4'	RKKRLEPT	205	244	>gi|13375656|	ref|NP_078794.1|	UL16 binding protein 3 [Homo sapiens]
P4-P4'	RGKRSPKS	64	138	>gi|50400088|	ref|NP_660357.2|	upper zone of growth plate and cartilage matrix associated [Homo sapiens]
P4-P4'	RIKRMVFK	120	725	>gi|38348304|	ref|NP_940898.1|	von Willebrand factor A domain containing 2 [Homo sapiens]
P4-P4'	RWKRQNFH	752	1590	>gi|209571555|	ref|NP_001129396.1|	von Willebrand factor D and EGF domains [Homo sapiens]
P4-P4'	RSKRSLSC	763	2813	>gi|89191868|	ref|NP_000543.2|	von Willebrand factor preproprotein [Homo sapiens]
P4-P4'	LRKRSVDQ	195	204	>gi|18079321|	ref|NP_542174.1|	V-set and transmembrane domain containing 2 like [Homo sapiens]
P4-P4'	RICRDIPK	66	231	>gi|32307109|	ref|NP_542181.1|	WAP four-disulfide core domain 3 precursor [Homo sapiens]
P4-P4'	HKKRSARD	68	1205	>gi|21265037|	ref|NP_055058.1|	ADAM metallopeptidase with thrombospondin type 1 motif, 3 proprotein [Homo sapiens]
Predicted furin substrates - membrane associated proteins (298 cleavages, 240 unique proteins)
Position	Peptide sequence	Cleavage position	Protein length	gi number	NP number	Protein name
P4-P4'	RVKRRADP	214	824	>gi|73747889|	ref|NP_003174.3|	a disintegrin and metalloprotease domain 17 preproprotein [Homo sapiens]
P4-P4'	VRKRDLQT	58	824	>gi|73747889|	ref|NP_003174.3|	a disintegrin and metalloprotease domain 17 preproprotein [Homo sapiens]
P4-P4'	RRRRDVVT	206	772	>gi|46909592|	ref|NP_997074.1|	a disintegrin and metalloproteinase domain 15 isoform 1 preproprotein [Homo sapiens]
P4-P4'	RSLREFEE	315	468	>gi|39930569|	ref|NP_937790.1|	abhydrolase domain containing 15 [Homo sapiens]
P4-P4'	RAKRAVSH	51	748	>gi|4557251|	ref|NP_001101.1|	ADAM metallopeptidase domain 10 [Homo sapiens]
P4-P4'	RKKRTTSA	213	748	>gi|4557251|	ref|NP_001101.1|	ADAM metallopeptidase domain 10 [Homo sapiens]
P4-P4'	RMKRDTSL	77	748	>gi|4557251|	ref|NP_001101.1|	ADAM metallopeptidase domain 10 [Homo sapiens]
P4-P4'	RLVRESSG	55	769	>gi|4585710|	ref|NP_002381.2|	ADAM metallopeptidase domain 11 preproprotein [Homo sapiens]
P4-P4'	RRKRQVRR	225	769	>gi|4585710|	ref|NP_002381.2|	ADAM metallopeptidase domain 11 preproprotein [Homo sapiens]
P4-P4'	RHKRETLK	207	909	>gi|73747885|	ref|NP_003465.3|	ADAM metallopeptidase domain 12 isoform 1 preproprotein [Homo sapiens]
P4-P4'	RMKREDLN	203	918	>gi|15451844|	ref|NP_150377.1|	ADAM metallopeptidase domain 19 preproprotein [Homo sapiens]
P4-P4'	RPRRMKRE	200	918	>gi|15451844|	ref|NP_150377.1|	ADAM metallopeptidase domain 19 preproprotein [Homo sapiens]
P4-P4'	RPKRSKRQ	222	906	>gi|11497047|	ref|NP_068369.1|	ADAM metallopeptidase domain 22 isoform 1 preproprotein [Homo sapiens]
P4-P4'	RSKRQLRR	225	906	>gi|11497047|	ref|NP_068369.1|	ADAM metallopeptidase domain 22 isoform 1 preproprotein [Homo sapiens]
P4-P4'	RYPRNVEE	232	906	>gi|11497047|	ref|NP_068369.1|	ADAM metallopeptidase domain 22 isoform 1 preproprotein [Homo sapiens]
P4-P4'	RRKRAVNP	286	832	>gi|4501913|	ref|NP_003803.1|	ADAM metallopeptidase domain 23 preproprotein [Homo sapiens]
P4-P4'	RRKRHDIA	289	775	>gi|98985828|	ref|NP_055080.2|	ADAM metallopeptidase domain 28 isoform 1 preproprotein [Homo sapiens]
P4-P4'	RGRREARR	203	813	>gi|18252045|	ref|NP_079496.1|	ADAM metallopeptidase domain 33 isoform alpha preproprotein [Homo sapiens]
P4-P4'	RTRRHLHD	282	856	>gi|69354859|	ref|NP_001100.2|	ADAM metallopeptidase domain 8 precursor [Homo sapiens]
P4-P4'	RRRRAVLP	205	819	>gi|4501915|	ref|NP_003807.1|	ADAM metallopeptidase domain 9 isoform 1 precursor [Homo sapiens]
P4-P4'	RGKRHLQG	157	411	>gi|9055278|	ref|NP_061324.1|	adherens junction associated protein 1 [Homo sapiens]
P4-P4'	RSRRCLRD	83	651	>gi|67782338|	ref|NP_001019978.1|	amyloid precursor-like protein 1 isoform 1 precursor [Homo sapiens]
P4-P4'	RVARDVAV	231	470	>gi|17136148|	ref|NP_001174.2|	ATPase, H+ transporting, lysosomal accessory protein 1 precursor [Homo sapiens]
P4-P4'	RAARHVVA	33	464	>gi|41350216|	ref|NP_061982.3|	beta-1,4-mannosyltransferase [Homo sapiens]
P4-P4'	RRGRAARH	30	464	>gi|41350216|	ref|NP_061982.3|	beta-1,4-mannosyltransferase [Homo sapiens]
P4-P4'	RIRRNAKG	316	424	>gi|7656928|	ref|NP_055297.1|	bone morphogenetic protein 10 preproprotein [Homo sapiens]
P4-P4'	REKRQAKH	282	396	>gi|4557369|	ref|NP_001191.1|	bone morphogenetic protein 2 preproprotein [Homo sapiens]
P4-P4'	RISRSLHQ	248	396	>gi|4557369|	ref|NP_001191.1|	bone morphogenetic protein 2 preproprotein [Homo sapiens]
P4-P4'	REKRWSVS	1509	1585	>gi|115387099|	ref|NP_001694.2|	brain-specific angiogenesis inhibitor 2 [Homo sapiens]
P4-P4'	RVRRSTAE	223	1114	>gi|15147240|	ref|NP_150279.1|	brother of CDO [Homo sapiens]
P4-P4'	RQKRDWVI	154	882	>gi|4757960|	ref|NP_004351.1|	cadherin 1, type 1 preproprotein [Homo sapiens]
P4-P4'	RQKRGWMW	54	788	>gi|16306530|	ref|NP_006718.2|	cadherin 10, type 2 preproprotein [Homo sapiens]
P4-P4'	RVPRSDGK	43	788	>gi|16306530|	ref|NP_006718.2|	cadherin 10, type 2 preproprotein [Homo sapiens]
P4-P4'	RSKRGWVW	53	796	>gi|16306532|	ref|NP_001788.2|	cadherin 11, type 2 preproprotein [Homo sapiens]
P4-P4'	RVKRGWVW	54	794	>gi|16445393|	ref|NP_004052.2|	cadherin 12, type 2 preproprotein [Homo sapiens]
P4-P4'	RVRRAWVI	45	814	>gi|4826669|	ref|NP_004924.1|	cadherin 15 preproprotein [Homo sapiens]
P4-P4'	RFSRTVQD	558	790	>gi|4826671|	ref|NP_004925.1|	cadherin 18, type 2 preproprotein [Homo sapiens]
P4-P4'	RPKRGWVW	53	790	>gi|4826671|	ref|NP_004925.1|	cadherin 18, type 2 preproprotein [Homo sapiens]
P4-P4'	RRRRFSRT	555	790	>gi|4826671|	ref|NP_004925.1|	cadherin 18, type 2 preproprotein [Homo sapiens]
P4-P4'	RVKRGWVW	43	772	>gi|12656655|	ref|NP_066976.1|	cadherin 19, type 2 preproprotein [Homo sapiens]
P4-P4'	RQKRDWVI	159	906	>gi|14589889|	ref|NP_001783.2|	cadherin 2, type 1 preproprotein [Homo sapiens]
P4-P4'	RTKRSWVW	59	801	>gi|16306537|	ref|NP_114097.2|	cadherin 20, type 2 preproprotein [Homo sapiens]
P4-P4'	RHKRDWVV	107	829	>gi|14589891|	ref|NP_001784.2|	cadherin 3, type 1 preproprotein [Homo sapiens]
P4-P4'	RRKRDWVI	169	916	>gi|14589893|	ref|NP_001785.2|	cadherin 4, type 1 preproprotein [Homo sapiens]
P4-P4'	RQKRDWIW	47	784	>gi|166362713|	ref|NP_001786.2|	cadherin 5, type 2 preproprotein [Homo sapiens]
P4-P4'	RSKRSWMW	53	790	>gi|4826673|	ref|NP_004923.1|	cadherin 6, type 2 preproprotein [Homo sapiens]
P4-P4'	RTKRSWVW	47	785	>gi|16306489|	ref|NP_004352.2|	cadherin 7, type 2 preproprotein [Homo sapiens]
P4-P4'	RALRSATQ	2139	3014	>gi|7656967|	ref|NP_055061.1|	cadherin EGF LAG seven-pass G-type receptor 1 [Homo sapiens]
P4-P4'	RARRGTSG	235	3014	>gi|7656967|	ref|NP_055061.1|	cadherin EGF LAG seven-pass G-type receptor 1 [Homo sapiens]
P4-P4'	RRRRHPDD	2328	3014	>gi|7656967|	ref|NP_055061.1|	cadherin EGF LAG seven-pass G-type receptor 1 [Homo sapiens]
P4-P4'	RQRRHPEL	2236	2923	>gi|13325064|	ref|NP_001399.1|	cadherin EGF LAG seven-pass G-type receptor 2 [Homo sapiens]
P4-P4'	RRKRNVNT	173	2923	>gi|13325064|	ref|NP_001399.1|	cadherin EGF LAG seven-pass G-type receptor 2 [Homo sapiens]
P4-P4'	RFRRAANR	317	3312	>gi|145309304|	ref|NP_001398.2|	cadherin EGF LAG seven-pass G-type receptor 3 [Homo sapiens]
P4-P4'	RRTRDLDP	3163	3312	>gi|145309304|	ref|NP_001398.2|	cadherin EGF LAG seven-pass G-type receptor 3 [Homo sapiens]
P4-P4'	RTRRSWVW	44	819	>gi|32880206|	ref|NP_071923.2|	cadherin-like 24 isoform 1 [Homo sapiens]
P4-P4'	RSKRRWVI	54	832	>gi|29570800|	ref|NP_817089.1|	cadherin-like 26 isoform a [Homo sapiens]
P4-P4'	RQRRDLLN	74	341	>gi|23097238|	ref|NP_690849.1|	carbohydrate sulfotransferase 13 [Homo sapiens]
P4-P4'	RTIRSFEG	93	327	>gi|110618224|	ref|NP_001754.2|	CD1A antigen precursor [Homo sapiens]
P4-P4'	RLTRSNSK	39	495	>gi|166197668|	ref|NP_055022.2|	CD5 molecule [Homo sapiens]
P4-P4'	RVKRRLLM	279	999	>gi|10190748|	ref|NP_066025.1|	CEGP1 protein [Homo sapiens]
P4-P4'	REKRRGVT	979	1288	>gi|47519929|	ref|NP_387504.2|	cell recognition molecule CASPR3 [Homo sapiens]
P4-P4'	RKARFIHD	505	2322	>gi|47419930|	ref|NP_001888.2|	chondroitin sulfate proteoglycan 4 [Homo sapiens]
P4-P4'	RKGRCVEP	332	349	>gi|86990448|	ref|NP_940947.3|	chromosome 1 open reading frame 187 [Homo sapiens]
P4-P4'	RNRRVTRR	325	349	>gi|86990448|	ref|NP_940947.3|	chromosome 1 open reading frame 187 [Homo sapiens]
P4-P4'	RRPRRVEA	431	450	>gi|189027135|	ref|NP_004807.3|	chromosome 9 open reading frame 61 [Homo sapiens]
P4-P4'	RSRRALPP	264	450	>gi|189027135|	ref|NP_004807.3|	chromosome 9 open reading frame 61 [Homo sapiens]
P4-P4'	RRKRSVAQ	182	488	>gi|4503625|	ref|NP_000495.1|	coagulation factor X preproprotein [Homo sapiens]
P4-P4'	KTRRSVDG	1514	1736	>gi|111118970|	ref|NP_542411.2|	collagen, type XI, alpha 2 isoform 1 preproprotein [Homo sapiens]
P4-P4'	RAQRSPQQ	246	1736	>gi|111118970|	ref|NP_542411.2|	collagen, type XI, alpha 2 isoform 1 preproprotein [Homo sapiens]
P4-P4'	RDRRSPAE	450	554	>gi|27262661|	ref|NP_000748.3|	colony stimulating factor 1 isoform a precursor [Homo sapiens]
P4-P4'	RPPRSTCQ	255	554	>gi|27262661|	ref|NP_000748.3|	colony stimulating factor 1 isoform a precursor [Homo sapiens]
P4-P4'	RNKRDTMV	416	591	>gi|4557391|	ref|NP_000057.1|	complement component 8, beta polypeptide preproprotein [Homo sapiens]
P4-P4'	RQMRSVDV	54	591	>gi|4557391|	ref|NP_000057.1|	complement component 8, beta polypeptide preproprotein [Homo sapiens]
P4-P4'	RFPRGVSR	189	1384	>gi|4505463|	ref|NP_003623.1|	contactin associated protein 1 precursor [Homo sapiens]
P4-P4'	RFVRFVPL	153	1306	>gi|18640734|	ref|NP_570129.1|	contactin associated protein-like 5 [Homo sapiens]
P4-P4'	RSIRDILA	500	529	>gi|67782356|	ref|NP_001255.3|	corneodesmosin precursor [Homo sapiens]
P4-P4'	RSNRDVFV	529	1406	>gi|41327708|	ref|NP_957705.1|	crumbs homolog 1 precursor [Homo sapiens]
P4-P4'	RLKRDRSA	542	607	>gi|30520377|	ref|NP_071317.2|	CUB and zona pellucida-like domains 1 [Homo sapiens]
P4-P4'	RSKRDISS	522	607	>gi|30520377|	ref|NP_071317.2|	CUB and zona pellucida-like domains 1 [Homo sapiens]
P4-P4'	RLPRGAEA	25	836	>gi|30410805|	ref|NP_073753.3|	CUB domain-containing protein 1 isoform 1 [Homo sapiens]
P4-P4'	RVRRAIPR	49	497	>gi|13899332|	ref|NP_113664.1|	cysteine-rich secretory protein LCCL domain containing 2 [Homo sapiens]
P4-P4'	RTRREAPR	2892	3298	>gi|16933557|	ref|NP_003728.1|	dachsous 1 precursor [Homo sapiens]
P4-P4'	RSKRRWAP	134	894	>gi|13435361|	ref|NP_077739.1|	desmocollin 1 isoform Dsc1a preproprotein [Homo sapiens]
P4-P4'	RQKRAWIT	49	1118	>gi|116534898|	ref|NP_001934.2|	desmoglein 2 preproprotein [Homo sapiens]
P4-P4'	RQKREWIK	49	1059	>gi|197313787|	ref|NP_001127925.1|	desmoglein 4 isoform 1 [Homo sapiens]
P4-P4'	RAKRQKDF	467	554	>gi|21361912|	ref|NP_071760.2|	DnaJ (Hsp40) homolog, subfamily C, member 1 [Homo sapiens]
P4-P4'	RKKREKKK	188	554	>gi|21361912|	ref|NP_071760.2|	DnaJ (Hsp40) homolog, subfamily C, member 1 [Homo sapiens]
P4-P4'	RVRRQIHA	312	895	>gi|148539835|	ref|NP_004384.2|	dystroglycan 1 preproprotein [Homo sapiens]
P4-P4'	RQPRSNGD	178	236	>gi|51511744|	ref|NP_055025.2|	ecotropic viral integration site 2A isoform 2 [Homo sapiens]
P4-P4'	RKAREVCD	360	428	>gi|4557427|	ref|NP_001240.1|	ectonucleoside triphosphate diphosphohydrolase 5 [Homo sapiens]
P4-P4'	CVRRSPCA	245	1541	>gi|110347457|	ref|NP_001400.3|	EGF-like-domain, multiple 3 [Homo sapiens]
P4-P4'	RSKRSTLL	312	500	>gi|148225659|	ref|NP_055851.1|	endonuclease domain containing 1 [Homo sapiens]
P4-P4'	RSYRIVRT	489	986	>gi|4758280|	ref|NP_004429.1|	ephrin receptor EphA4 [Homo sapiens]
P4-P4'	RPRRDCVA	491	1342	>gi|54792100|	ref|NP_001973.2|	erbB-3 isoform 1 precursor [Homo sapiens]
P4-P4'	RNKRSTQI	492	1116	>gi|134304838|	ref|NP_004827.4|	eukaryotic translation initiation factor 2-alpha kinase 3 [Homo sapiens]
P4-P4'	RSRRSQIN	100	429	>gi|16418419|	ref|NP_443170.1|	Fc receptor-like 1 isoform 1 precursor [Homo sapiens]
P4-P4'	IKKRSLRS	272	734	>gi|21314764|	ref|NP_443171.2|	Fc receptor-like 3 precursor [Homo sapiens]
P4-P4'	RSLRSQIR	275	734	>gi|21314764|	ref|NP_443171.2|	Fc receptor-like 3 precursor [Homo sapiens]
P4-P4'	RQKRSIHE	2779	2912	>gi|66346695|	ref|NP_001990.2|	fibrillin 2 precursor [Homo sapiens]
P4-P4'	RHVRSYNH	68	208	>gi|4758360|	ref|NP_004456.1|	fibroblast growth factor 10 precursor [Homo sapiens]
P4-P4'	RLARFADG	170	437	>gi|18765711|	ref|NP_055159.2|	four jointed box 1 [Homo sapiens]
P4-P4'	RPARSGGP	52	437	>gi|18765711|	ref|NP_055159.2|	four jointed box 1 [Homo sapiens]
P4-P4'	RPLRDAGG	269	437	>gi|18765711|	ref|NP_055159.2|	four jointed box 1 [Homo sapiens]
P4-P4'	IGKRSVEY	3030	3169	>gi|79749430|	ref|NP_997244.3|	FRAS1-related extracellular matrix protein 2 precursor [Homo sapiens]
P4-P4'	RKKREIRS	3053	3169	>gi|79749430|	ref|NP_997244.3|	FRAS1-related extracellular matrix protein 2 precursor [Homo sapiens]
P4-P4'	RTKRQIPH	3085	3169	>gi|79749430|	ref|NP_997244.3|	FRAS1-related extracellular matrix protein 2 precursor [Homo sapiens]
P4-P4'	RKSRGTST	549	666	>gi|8393378|	ref|NP_059108.1|	frizzled 3 [Homo sapiens]
P4-P4'	RTKRDVYQ	107	794	>gi|4505579|	ref|NP_002560.1|	furin preproprotein [Homo sapiens]
P4-P4'	VTKRSLSP	75	794	>gi|4505579|	ref|NP_002560.1|	furin preproprotein [Homo sapiens]
P4-P4'	RLKRNIGY	241	474	>gi|194097327|	ref|NP_000803.2|	gamma-aminobutyric acid (GABA) A receptor, beta 1 precursor [Homo sapiens]
P4-P4'	RLKRNIGY	241	473	>gi|4503867|	ref|NP_000805.1|	gamma-aminobutyric acid (GABA) A receptor, beta 3 isoform 1 precursor [Homo sapiens]
P4-P4'	RLKRHPEE	456	961	>gi|10835015|	ref|NP_001461.1|	gamma-aminobutyric acid (GABA) B receptor 1 isoform a precursor [Homo sapiens]
P4-P4'	RVRKSKGK	727	894	>gi|163659856|	ref|NP_015564.4|	glutamate receptor, ionotrophic, AMPA 3 isoform 1 precursor [Homo sapiens]
P4-P4'	RVRKSKGK	717	902	>gi|164419734|	ref|NP_000820.3|	glutamate receptor, ionotrophic, AMPA 4 isoform 1 precursor [Homo sapiens]
P4-P4'	RVRKSKGK	709	906	>gi|167001419|	ref|NP_000818.2|	glutamate receptor, ionotropic, AMPA 1 isoform 1 [Homo sapiens]
P4-P4'	RVRKSKGK	716	883	>gi|74275354|	ref|NP_000817.2|	glutamate receptor, ionotropic, AMPA 2 isoform 1 precursor [Homo sapiens]
P4-P4'	RARRAVDK	926	1043	>gi|62988346|	ref|NP_619635.1|	glutamate receptor, ionotropic, N-methyl-D-aspartate 3B [Homo sapiens]
P4-P4'	RPRRLLQA	1021	1043	>gi|62988346|	ref|NP_619635.1|	glutamate receptor, ionotropic, N-methyl-D-aspartate 3B [Homo sapiens]
P4-P4'	RQKRAVAT	51	1346	>gi|148719673|	ref|NP_056049.4|	G-protein coupled receptor 116 [Homo sapiens]
P4-P4'	RHRRGQET	319	454	>gi|4885261|	ref|NP_005251.1|	growth differentiation factor 9 precursor [Homo sapiens]
P4-P4'	RNRRGAIT	335	426	>gi|47458048|	ref|NP_998818.1|	hemojuvelin isoform a precursor [Homo sapiens]
P4-P4'	RQKRREER	434	471	>gi|45580707|	ref|NP_703157.2|	heparan sulfate 6-O-sulfotransferase 3 [Homo sapiens]
P4-P4'	RKRRNTIH	36	728	>gi|33859835|	ref|NP_000592.3|	hepatocyte growth factor isoform 1 preproprotein [Homo sapiens]
P4-P4'	RTRRYTLF	2095	2623	>gi|38490688|	ref|NP_849144.2|	immunoglobulin superfamily, member 10 [Homo sapiens]
P4-P4'	RRHRSYSP	422	502	>gi|28557777|	ref|NP_787120.1|	immunoglobulin-like domain containing receptor 1 [Homo sapiens]
P4-P4'	RRRRHRSY	420	502	>gi|28557777|	ref|NP_787120.1|	immunoglobulin-like domain containing receptor 1 [Homo sapiens]
P4-P4'	RKRRSLGD	762	1382	>gi|119395736|	ref|NP_000199.2|	insulin receptor isoform Long precursor [Homo sapiens]
P4-P4'	RKRRDVMQ	740	1367	>gi|4557665|	ref|NP_000866.1|	insulin-like growth factor 1 receptor precursor [Homo sapiens]
P4-P4'	RRRRQLDP	875	1051	>gi|4504747|	ref|NP_002195.1|	integrin alpha 3 isoform a precursor [Homo sapiens]
P4-P4'	RPKRYFTI	974	1032	>gi|67191027|	ref|NP_000876.3|	integrin alpha 4 precursor [Homo sapiens]
P4-P4'	RKKREITE	902	1091	>gi|119395740|	ref|NP_001073286.1|	integrin alpha chain, alpha 6 isoform a precursor [Homo sapiens]
P4-P4'	RQRRALEK	178	1179	>gi|148728188|	ref|NP_002199.3|	integrin, alpha E precursor [Homo sapiens]
P4-P4'	RTKRTPGP	62	1179	>gi|148728188|	ref|NP_002199.3|	integrin, alpha E precursor [Homo sapiens]
P4-P4'	RTKRAQSP	30	271	>gi|4504561|	ref|NP_001535.1|	intercellular adhesion molecule 4 isoform 1 precursor [Homo sapiens]
P4-P4'	RVPRDWDP	465	551	>gi|4504665|	ref|NP_000869.1|	interleukin 2 receptor beta precursor [Homo sapiens]
P4-P4'	RRRRSILF	81	1241	>gi|57242793|	ref|NP_057331.2|	interphotoreceptor matrix proteoglycan 2 [Homo sapiens]
P4-P4'	RRNRSTST	465	1469	>gi|163792198|	ref|NP_056051.2|	latrophilin 3 precursor [Homo sapiens]
P4-P4'	VHKRSAER	561	1613	>gi|148727288|	ref|NP_002327.2|	low density lipoprotein receptor-related protein 6 [Homo sapiens]
P4-P4'	RARRDAGP	86	379	>gi|93140999|	ref|NP_001035257.1|	lunatic fringe isoform a [Homo sapiens]
P4-P4'	RRRRGAPE	309	1400	>gi|153946393|	ref|NP_002438.2|	macrophage stimulating 1 receptor precursor [Homo sapiens]
P4-P4'	RSARDTAQ	89	358	>gi|62912479|	ref|NP_005507.3|	major histocompatibility complex, class I, E precursor [Homo sapiens]
P4-P4'	RRKRYAIQ	111	582	>gi|4826834|	ref|NP_004986.1|	matrix metalloproteinase 14 preproprotein [Homo sapiens]
P4-P4'	RRKRYALT	131	669	>gi|4505211|	ref|NP_002419.1|	matrix metalloproteinase 15 preproprotein [Homo sapiens]
P4-P4'	RNKRYALT	155	645	>gi|5729929|	ref|NP_006681.1|	matrix metalloproteinase 24 preproprotein [Homo sapiens]
P4-P4'	RRRRNKRY	152	645	>gi|5729929|	ref|NP_006681.1|	matrix metalloproteinase 24 preproprotein [Homo sapiens]
P4-P4'	RSKRVLWD	622	1052	>gi|4506775|	ref|NP_003782.1|	membrane-bound transcription factor site-1 protease preproprotein [Homo sapiens]
P4-P4'	RQKRSVEN	653	746	>gi|153070262|	ref|NP_005579.2|	meprin A alpha [Homo sapiens]
P4-P4'	RFRREVEK	295	622	>gi|53988378|	ref|NP_005814.2|	mesothelin isoform 1 preproprotein [Homo sapiens]
P4-P4'	RKKRSTKK	307	1408	>gi|188595716|	ref|NP_001120972.1|	met proto-oncogene isoform a precursor [Homo sapiens]
P4-P4'	RCPRQVST	316	515	>gi|66346700|	ref|NP_057340.2|	N-acetylglucosamine-1-phosphodiester alpha-N-acetylglucosaminidase precursor [Homo sapiens]
P4-P4'	RLPRDCTR	49	515	>gi|66346700|	ref|NP_057340.2|	N-acetylglucosamine-1-phosphodiester alpha-N-acetylglucosaminidase precursor [Homo sapiens]
P4-P4'	RSKRREMQ	141	1712	>gi|14211536|	ref|NP_055895.1|	neurexin 2 isoform alpha-1 precursor [Homo sapiens]
P4-P4'	RKNRSTAS	297	432	>gi|41350305|	ref|NP_620426.2|	neurexin 3 isoform 2 precursor [Homo sapiens]
P4-P4'	RMKRFRVD	141	174	>gi|5729947|	ref|NP_006672.1|	neuromedin U [Homo sapiens]
P4-P4'	RNRRHIEK	897	1304	>gi|81158226|	ref|NP_001032209.1|	neuronal cell adhesion molecule isoform A precursor [Homo sapiens]
P4-P4'	RLARALSP	629	709	>gi|24638433|	ref|NP_056146.1|	nicastrin precursor [Homo sapiens]
P4-P4'	RPAREVGD	46	501	>gi|41327726|	ref|NP_000738.2|	nicotinic acetylcholine receptor beta 1 subunit precursor [Homo sapiens]
P4-P4'	RPPRSPDH	1115	1484	>gi|167003331|	ref|NP_000825.2|	N-methyl-D-aspartate receptor subunit 2B precursor [Homo sapiens]
P4-P4'	RHRRAAGG	1255	1336	>gi|153946391|	ref|NP_000827.2|	N-methyl-D-aspartate receptor subunit 2D precursor [Homo sapiens]
P4-P4'	RWPRSDPE	1063	1336	>gi|153946391|	ref|NP_000827.2|	N-methyl-D-aspartate receptor subunit 2D precursor [Homo sapiens]
P4-P4'	RIKRDSQG	1581	2471	>gi|24041035|	ref|NP_077719.2|	notch 2 preproprotein [Homo sapiens]
P4-P4'	RRKKSLSE	2133	2471	>gi|24041035|	ref|NP_077719.2|	notch 2 preproprotein [Homo sapiens]
P4-P4'	RLKRYHSQ	169	667	>gi|5803109|	ref|NP_006803.1|	osteosarcoma amplified 9 isoform 1 precursor [Homo sapiens]
P4-P4'	RPRRSLAL	61	100	>gi|30425368|	ref|NP_848544.1|	parathyroid hormone 2 preproprotein [Homo sapiens]
P4-P4'	RGRRSLEF	1336	1479	>gi|109150416|	ref|NP_036425.1|	peroxidasin [Homo sapiens]
P4-P4'	RSKRLLSD	148	395	>gi|23199983|	ref|NP_005473.1|	phosphatidylinositol glycan anchor biosynthesis, class K precursor [Homo sapiens]
P4-P4'	RAKRVSWD	342	1568	>gi|5032223|	ref|NP_005752.1|	plexin C1 [Homo sapiens]
P4-P4'	RPARSVGS	282	330	>gi|11641275|	ref|NP_071753.1|	potassium family, subfamily K, member 15 [Homo sapiens]
P4-P4'	RIKRSRKL	189	865	>gi|5174387|	ref|NP_006008.1|	prominin 1 isoform 1 [Homo sapiens]
P4-P4'	RFRRSVPR	61	260	>gi|7019519|	ref|NP_037403.1|	proprotein convertase subtilisin/kexin type 1 inhibitor precursor [Homo sapiens]
P4-P4'	RLRRAADH	220	260	>gi|7019519|	ref|NP_037403.1|	proprotein convertase subtilisin/kexin type 1 inhibitor precursor [Homo sapiens]
P4-P4'	RKRRSIRY	1178	1912	>gi|4506309|	ref|NP_002830.1|	protein tyrosine phosphatase, receptor type, D isoform 1 precursor [Homo sapiens]
P4-P4'	RRRRQAER	1178	1907	>gi|109633041|	ref|NP_002831.2|	protein tyrosine phosphatase, receptor type, F isoform 1 precursor [Homo sapiens]
P4-P4'	RTKREAGA	644	1446	>gi|208431815|	ref|NP_001129120.1|	protein tyrosine phosphatase, receptor type, K isoform a [Homo sapiens]
P4-P4'	RLRREPGG	639	1436	>gi|110735404|	ref|NP_573439.2|	protein tyrosine phosphatase, receptor type, U isoform 1 precursor [Homo sapiens]
P4-P4'	RLKRTNGN	404	1184	>gi|7706113|	ref|NP_057664.1|	protocadherin 12 precursor [Homo sapiens]
P4-P4'	REKRSEYS	428	1135	>gi|14589929|	ref|NP_061908.1|	protocadherin 18 precursor [Homo sapiens]
P4-P4'	RSRRDGRK	186	796	>gi|9256614|	ref|NP_061760.1|	protocadherin beta 3 precursor [Homo sapiens]
P4-P4'	RLKRALDF	304	795	>gi|7661662|	ref|NP_056484.1|	protocadherin beta 5 precursor [Homo sapiens]
P4-P4'	RLPRSAPP	581	944	>gi|11128023|	ref|NP_061752.1|	protocadherin gamma subfamily C, 5 isoform 1 precursor [Homo sapiens]
P4-P4'	RPKRLDSA	928	1150	>gi|83281200|	ref|NP_776175.2|	protogenin [Homo sapiens]
P4-P4'	RQKRNKIP	363	747	>gi|13325075|	ref|NP_002817.2|	quiescin Q6 sulfhydryl oxidase 1 isoform a [Homo sapiens]
P4-P4'	RARRQLGT	1142	2253	>gi|5174633|	ref|NP_006062.1|	receptor for egg jelly-like protein precursor [Homo sapiens]
P4-P4'	RRPRFKDI	738	937	>gi|134152725|	ref|NP_005003.2|	receptor tyrosine kinase-like orphan receptor 1 isoform 1 [Homo sapiens]
P4-P4'	RARRGVEV	130	430	>gi|21361873|	ref|NP_116260.2|	RELT tumor necrosis factor receptor precursor [Homo sapiens]
P4-P4'	RARRFAQI	418	1114	>gi|10862703|	ref|NP_066124.1|	ret proto-oncogene isoform a [Homo sapiens]
P4-P4'	RFPRAAHP	392	783	>gi|56711322|	ref|NP_060233.3|	ring finger protein 43 [Homo sapiens]
P4-P4'	RKRRGGPS	657	783	>gi|56711322|	ref|NP_060233.3|	ring finger protein 43 [Homo sapiens]
P4-P4'	RARRFCRD	55	372	>gi|4506875|	ref|NP_000646.1|	selectin L precursor [Homo sapiens]
P4-P4'	RDRRQATE	41	402	>gi|4506879|	ref|NP_002997.1|	selectin P ligand [Homo sapiens]
P4-P4'	RFRRQDVR	554	749	>gi|4759092|	ref|NP_004627.1|	semaphorin 3B isoform 1 precursor [Homo sapiens]
P4-P4'	RGPRSATH	744	749	>gi|4759092|	ref|NP_004627.1|	semaphorin 3B isoform 1 precursor [Homo sapiens]
P4-P4'	RVPRSVPR	38	770	>gi|19923279|	ref|NP_004254.2|	semaphorin W [Homo sapiens]
P4-P4'	RRVRSAEE	305	551	>gi|4502659|	ref|NP_003821.1|	sialic acid binding Ig-like lectin 5 [Homo sapiens]
P7-P1'	SKERSKRS	96	98	>gi|149999382|	ref|NP_001556.2|	small inducible cytokine B10 precursor [Homo sapiens]
P4-P4'	RIKKSKMI	565	787	>gi|5032099|	ref|NP_005622.1|	smoothened [Homo sapiens]
P4-P4'	RRKRKKEV	678	787	>gi|5032099|	ref|NP_005622.1|	smoothened [Homo sapiens]
P4-P4'	RSIRDAED	609	834	>gi|194239733|	ref|NP_004165.2|	solute carrier family 9 (sodium/hydrogen exchanger), isoform 3 [Homo sapiens]
P4-P4'	RRRRSGAD	110	1168	>gi|61743973|	ref|NP_443150.3|	SORCS receptor 1 isoform a [Homo sapiens]
P4-P4'	RIFRSSDF	199	831	>gi|17149834|	ref|NP_002950.3|	sortilin 1 preproprotein [Homo sapiens]
P4-P4'	RWRRSAPG	77	831	>gi|17149834|	ref|NP_002950.3|	sortilin 1 preproprotein [Homo sapiens]
P4-P4'	RRKRSAAL	81	2214	>gi|4507157|	ref|NP_003096.1|	sortilin-related receptor containing LDLR class A repeats preproprotein [Homo sapiens]
P4-P4'	RRRRERDD	131	795	>gi|4507173|	ref|NP_003110.1|	spastic paraplegia 7 isoform 1 [Homo sapiens]
P4-P4'	RQRRAITV	344	1775	>gi|24308527|	ref|NP_714544.1|	stereocilin [Homo sapiens]
P4-P4'	RSIRSVAI	538	870	>gi|29789100|	ref|NP_061325.1|	sulfatase 2 isoform a precursor [Homo sapiens]
P4-P4'	RVWRDSFL	409	870	>gi|29789100|	ref|NP_061325.1|	sulfatase 2 isoform a precursor [Homo sapiens]
P4-P4'	RSKRDGSE	543	1264	>gi|142976733|	ref|NP_058648.4|	surface glycoprotein, Ig superfamily member [Homo sapiens]
P4-P4'	RRSRKVGS	418	747	>gi|42476320|	ref|NP_071931.2|	sushi domain containing 1 [Homo sapiens]
P4-P4'	RHKRQSGV	33	2201	>gi|153946395|	ref|NP_002151.2|	tenascin C precursor [Homo sapiens]
P7-P1'	LEGRRKRA	2200	2201	>gi|153946395|	ref|NP_002151.2|	tenascin C precursor [Homo sapiens]
P4-P4'	RLKRIVFD	358	454	>gi|38505222|	ref|NP_061895.3|	thioredoxin domain containing 10 [Homo sapiens]
P4-P4'	LKKRGILS	65	933	>gi|28558982|	ref|NP_000538.3|	thyroid peroxidase isoform a [Homo sapiens]
P4-P4'	RKRRSTDF	455	1041	>gi|20302168|	ref|NP_619542.1|	toll-like receptor 8 [Homo sapiens]
P4-P4'	RSRRDREE	217	321	>gi|145386578|	ref|NP_001078816.1|	torsin family 2, member A isoform a [Homo sapiens]
P4-P4'	RKKRALDA	330	442	>gi|208022653|	ref|NP_001129071.1|	transforming growth factor, beta 2 isoform 1 [Homo sapiens]
P4-P4'	RKKRALDT	300	412	>gi|4507465|	ref|NP_003230.1|	transforming growth factor, beta 3 [Homo sapiens]
P4-P4'	RLRRRREG	53	348	>gi|32698940|	ref|NP_872365.1|	transmembrane protease, serine 12 [Homo sapiens]
P4-P4'	RRRREGGA	55	348	>gi|32698940|	ref|NP_872365.1|	transmembrane protease, serine 12 [Homo sapiens]
P4-P4'	RFRRGLDN	215	226	>gi|112807182|	ref|NP_078876.2|	transmembrane protein 204 [Homo sapiens]
P4-P4'	RRRRKQRK	135	393	>gi|114431216|	ref|NP_612358.3|	tumor protein p53 inducible protein 13 [Homo sapiens]
P4-P4'	RPKRADTF	162	348	>gi|30410788|	ref|NP_006756.2|	tumor suppressor candidate 3 isoform a [Homo sapiens]
P4-P4'	RRRREYWQ	396	520	>gi|17865814|	ref|NP_004656.2|	vanin 2 isoform 1 precursor [Homo sapiens]
P4-P4'	RSRRAQPP	133	1222	>gi|18379346|	ref|NP_055793.1|	VPS10 domain receptor protein SORCS 3 [Homo sapiens]
P4-P4'	RHKRGRGD	193	365	>gi|16507239|	ref|NP_006513.1|	wingless-type MMTV integration site family, member 6 precursor [Homo sapiens]
P4-P4'	RQRRSSGH	555	638	>gi|66348148|	ref|NP_997224.2|	zona pellucida glycoprotein 1 [Homo sapiens]
P4-P4'	RNRRHVTE	352	424	>gi|160358850|	ref|NP_001103824.1|	zona pellucida glycoprotein 3 isoform 1 precursor [Homo sapiens]
P4-P4'	RERRDAGR	335	431	>gi|28372569|	ref|NP_778226.1|	zona pellucida-like domain containing 1 [Homo sapiens]
P4-P4'	RVPRDPST	34	390	>gi|119220572|	ref|NP_001007242.2|	zymogen granule membrane glycoprotein 2 isoform 3 [Homo sapiens]
